# Supplementary material
Source: PubMed Central journal article supplement (PMC9119066)
Supplement: jcm.00178-22-s0001.pdf [file jcm.00178-22-s0001.pdf]

## 1 SUPPLEMENTAL METHODS

2

### 3 *Assay Design*

4 The primers and probes for Reaction 1 have been previously reported (1). The primers and probes used  
5 for Reaction 2 are summarized in Table 1. The wt69-70 probe anneals to the same amplicon as the  
6 del69-70 probe. Primers and dual-labeled BHQ-quenched hydrolysis probes were ordered from ELIM  
7 Biopharmaceuticals (Hayward, CA, USA) or the Stanford Protein and Nucleic Acid Facility (Stanford, CA,  
8 USA), rehydrated to 100 $\mu$ M in Tris-EDTA buffer, and combined to create bulk primer/probe mix. We used  
9 synthetic whole-genome RNA fragments as a wild-type control (Twist Bioscience, San Francisco, CA,  
10 USA) diluted to 10<sup>4</sup> copies/ $\mu$ L in Tris-EDTA buffer (10 mM Tris, 1 mM EDTA). For the positive control, we  
11 pooled six individual ssDNA mutant oligonucleotides (del69-70, K417N, T478K, L452R, E484K, N501Y)  
12 (Elim Biopharmaceuticals, Hayward, CA, USA) in equimolar ratios diluted to 10<sup>4</sup> copies/ $\mu$ L each in Tris-  
13 EDTA buffer (10 mM Tris, 1 mM EDTA) (Supplemental Table 1).

14

15 For both Reaction 1 and Reaction 2, primer/probe mix (1  $\mu$ L) was combined with a one-step RT-qPCR  
16 system (12.5  $\mu$ L master mix + 0.5  $\mu$ L *Taq* polymerase, SuperScript™ III Platinum™ One-Step qRT-PCR  
17 Kit, Invitrogen, Carlsbad), nuclease-free water (6.0  $\mu$ L), and template (5.0  $\mu$ L) in a 25  $\mu$ L reaction. All  
18 experiments were conducted on a BioRad CFX96 real-time PCR instrument in 96-well plates (BioRad,  
19 Hercules, CA, USA). One mutant control (pooled ssDNA mutant oligonucleotides) and one wild-type  
20 control (Twist whole-genome synthetic RNA) were included in each RT-qPCR plate. Cycling conditions  
21 for Reaction 1 were: 52°C for 15:00, 94°C for 2:00, and then 45 cycles of 94°C for 00:15, 57.0°C for  
22 00:40, and 68°C for 00:20. Annealing temperature was optimized with a temperature gradient. Cycling  
23 conditions for Reaction 2 were identical, except for the annealing temperature, which was set at 58.0°C.

24

25 Fluorescence was collected in all channels (1, T478K-FAM; 2, del60-70-HEX; 3, wt69-70-Cy3.5 (ROX); 4,  
26 K417N-CY5; 5, no probe). Fixed fluorescence thresholds of 500 relative fluorescence units ([RFU],  
27 T478K-FAM), 500 RFU (del60-70-HEX), 50 RFU (wt69-70-Cy3.5), and 300 RFU (K417N-Cy5) were used  
28 to determine the threshold cycle ( $C_t$ ). Assay interpretation is described in detail in Table 2.

29

30 *Sample Storage and Nucleic Acid Extraction*

31 Samples positive for SARS-CoV-2 were stored at -80°C for up to 1 week prior to re-extraction for  
32 genotyping RT-qPCR. Total nucleic acids were extracted from 300 µL viral transport media, universal  
33 transport media, or phosphate-buffered saline, and eluted into 60 µL elution buffer on an automated  
34 platform into a 96-well plate (PerkinElmer Janus G3 Reformatter, Chemagic 360 nucleic acid extractor,  
35 and Chemagic Viral DNA/RNA 300 Kit). Eluate plates were stored for up to 6 months at 4°C between  
36 setup of genotyping RT-qPCR Reaction 1 and Reaction 2.

37

38 *Clinical Specimen NAAT Platforms*

39 Prior to genotyping RT-qPCR, initial respiratory SARS-CoV-2 NAAT was conducted on a variety of  
40 platforms (Table 1) (2-4). These included: 1) a previously-described laboratory-developed reverse  
41 transcription quantitative polymerase chain reaction (RT-qPCR) targeting the envelope gene (*E* gene) on  
42 the Rotor-Gene Q (Qiagen, Germantown, MD) (2-4); 2) PerkinElmer RT-qPCR assay targeting open  
43 reading frame 1ab (ORF1ab) and nucleocapsid gene (*N* gene) PerkinElmer, San Jose, CA); 3) Panther  
44 Fusion SARS-CoV-2 (Hologic, Marlborough, MA) RT-qPCR targeting ORF1ab; 4) Aptima SARS-CoV2  
45 (Panther System, Hologic) transcription mediated amplification targeting ORF1ab; 5) GeneXpert Xpress  
46 SARS-CoV-2 (Cepheid, Sunnyvale, CA) RT-qPCR targeting the *E* and *N* genes; 6) cobas Liat SARS-  
47 CoV-2 & Influenza A/B (Roche, Indianapolis, IN), RT-qPCR targeting ORF1ab and *N* gene; 7) e-Plex  
48 SARS-CoV-2 (Genmark, Carlsbad, CA), RT-PCR targeting the *N* gene. All specimens testing positive for  
49 SARS-CoV-2 by NAAT with RT-qPCR  $C_t \leq 30$  or transcription-mediated amplification relative light units  
50 (RLU)  $\geq 1,100$  during this period were subject to multiplex allele-specific genotyping RT-qPCR. A subset  
51 of included specimens tested by rapid NAATs (Cepheid GeneXpert, Roche Liat, Genmark Eplex) did not  
52 have  $C_t$  values available and were included irrespective of viral load. All assays were conducted  
53 according to manufacturer and emergency authorization instructions.

54

55 *Analytical Performance*

56 To determine the lower limit of detection (LLOD), the pool of six mutant ssDNA oligonucleotides  
57 described above was diluted to 100 copies/ $\mu$ L template, 10 copies/ $\mu$ L, 5 copies/ $\mu$ L, and 1 copies/ $\mu$ L in  
58 Tris-EDTA buffer in replicates of 20. Any amplification crossing the fluorescence threshold was regarded  
59 as detection. The 95% LLOD was determined by fitting these data to a probit regression curve. The  
60 respective 95% LLODs for the del69-70, K417N, and T478K targets were 14.8 (95% CI 10.5-27.2), 16.4  
61 (11.3-44.3), and 2.1 (2.1-8.1) copies/ $\mu$ L template respectively (Supplemental Table 2). We observed no  
62 non-specific wt69-70 (Cy3.5) amplification even at high ( $10^6$  copies/ $\mu$ L) mutant ssDNA copy number;  
63 similarly, we observed no non-specific del69-70, K417N, and T478K non-specific amplification at high  
64 concentration ( $10^6$  copies/ $\mu$ L) of the wild-type TWIST synthetic RNA. Precision was not assessed for this  
65 qualitative assay.  
66  
67

68 **SUPPLEMENTAL REFERENCES**

- 69 1. Wang H, Miller JA, Verghese M, Sibai M, Solis D, Mfuh KO, Jiang B, Iwai N, Mar M, Huang C,  
70 Yamamoto F, Sahoo MK, Zehnder J, Pinsky BA. 2021. Multiplex SARS-CoV-2 Genotyping  
71 Reverse Transcriptase PCR for Population-Level Variant Screening and Epidemiologic  
72 Surveillance. *J Clin Microbiol* 59:e0085921.
- 73 2. Corman VM, Landt O, Kaiser M, Molenkamp R, Meijer A, Chu DK, Bleicker T, Brunink S,  
74 Schneider J, Schmidt ML, Mulders DG, Haagmans BL, van der Veer B, van den Brink S, Wijsman  
75 L, Goderski G, Romette JL, Ellis J, Zambon M, Peiris M, Goossens H, Reusken C, Koopmans  
76 MP, Drosten C. 2020. Detection of 2019 novel coronavirus (2019-nCoV) by real-time RT-PCR.  
77 *Euro Surveill* 25.
- 78 3. Bulterys PL, Garamani N, Stevens B, Sahoo MK, Huang C, Hogan CA, Zehnder J, Pinsky BA.  
79 2020. Comparison of a laboratory-developed test targeting the envelope gene with three nucleic  
80 acid amplification tests for detection of SARS-CoV-2. *J Clin Virol* 129:104427.
- 81 4. Hogan CA, Sahoo MK, Pinsky BA. 2020. Sample Pooling as a Strategy to Detect Community  
82 Transmission of SARS-CoV-2. *JAMA* 323:1967-1969.

83

84

85 **Supplemental Figure 1.** In silico analysis primer/probes, per GISAID Nextclade sequences downloaded  
 86 December 5, 2021. Green shading indicates >95% of sequences from that variant designation have  
 87 perfect homology to a primer/probe sequence expected to be detected in this variant. Red shading  
 88 indicates <95% of sequences are homologous to a probe sequence expected to be detected in this  
 89 variant, and probe dropout or diminished efficiency of binding is expected to occur. Yellow shading  
 90 indicates >5% of sequences have unexpected probe homology to the mutation of interest.

91

| Primer/Probe     | Alpha                | Beta               | Delta                  | Gamma              | Omicron           | Lambda             | Mu                 | Non-VOC/VOI          |
|------------------|----------------------|--------------------|------------------------|--------------------|-------------------|--------------------|--------------------|----------------------|
| L452R_FWD        | 100%<br>(n=164/164)  | 100%<br>(n=35/35)  | 99.7%<br>(n=2082/2089) | 98.8%<br>(n=81/82) | 100%<br>(n=14/14) | 100%<br>(n=22/22)  | 100%<br>(n=22/22)  | 99.7%<br>(n=950/953) |
| L452R_REV        | 99.4%<br>(n=163/164) | 100%<br>(n=35/35)  | 99.1%<br>(n=2069/2087) | 100%<br>(n=82/82)  | 0%<br>(n=0/14)    | 100%<br>(n=22/22)  | 100%<br>(n=22/22)  | 99.6%<br>(n=941/945) |
| L452R_mt_HEX     | 0%<br>(n=0/163)      | 0%<br>(n=0/35)     | 99.3%<br>(n=2073/2088) | 0%<br>(n=0/81)     | 0%<br>(n=0/14)    | 0%<br>(n=0/22)     | 0%<br>(n=0/22)     | 9.2%<br>(n=87/945)   |
| E484K_FWD_V2     | 98.2%<br>(n=160/163) | 100%<br>(n=35/35)  | 99.7%<br>(n=2081/2088) | 97.5%<br>(n=79/81) | 100%<br>(n=17/17) | 100%<br>(n=22/22)  | 100%<br>(n=22/22)  | 99.3%<br>(n=943/950) |
| E484K_REV_V2     | 100%<br>(n=163/163)  | 100%<br>(n=35/35)  | 99.7%<br>(n=2024/2030) | 98.8%<br>(n=81/82) | 100%<br>(n=19/19) | 100%<br>(n=24/24)  | 95.5%<br>(n=21/22) | 99.9%<br>(n=943/944) |
| E484K_mt_CY5     | 1.8%<br>(n=3/165)    | 97.2%<br>(n=35/36) | 0.1%<br>(n=2/2089)     | 98.8%<br>(n=79/80) | 0%<br>(n=0/18)    | 0%<br>(n=0/24)     | 100%<br>(n=21/21)  | 6.9%<br>(n=65/948)   |
| N501Y_mt_FAM     | 100%<br>(n=161/161)  | 94.4%<br>(n=34/36) | 0%<br>(n=0/2043)       | 100%<br>(n=81/81)  | 0%<br>(n=0/18)    | 0%<br>(n=0/24)     | 100%<br>(n=21/21)  | 1.4%<br>(n=13/946)   |
| N501Y_WT_CY3.5   | 0%<br>(n=0/161)      | 5.6%<br>(n=2/36)   | 99.7%<br>(n=2037/2043) | 0%<br>(n=0/81)     | 0%<br>(n=0/18)    | 100%<br>(n=24/24)  | 0%<br>(n=0/21)     | 97.4%<br>(n=921/946) |
| del69.70_FWD_V2  | 100%<br>(n=169/169)  | 97.4%<br>(n=38/39) | 99.5%<br>(n=1714/1722) | 100%<br>(n=81/81)  | 100%<br>(n=19/19) | 100%<br>(n=24/24)  | 100%<br>(n=22/22)  | 99.8%<br>(n=968/970) |
| del69.70_REV_V2  | 99.4%<br>(n=170/171) | 100%<br>(n=39/39)  | 99.3%<br>(n=1862/1876) | 100%<br>(n=81/81)  | 100%<br>(n=19/19) | 100%<br>(n=24/24)  | 100%<br>(n=22/22)  | 96.8%<br>(n=945/976) |
| del69.70_mt_HEX  | 99.4%<br>(n=166/167) | 0%<br>(n=0/39)     | 0.2%<br>(n=4/1747)     | 1.2%<br>(n=1/81)   | 0%<br>(n=0/17)    | 0%<br>(n=0/24)     | 0%<br>(n=0/22)     | 1.8%<br>(n=17/970)   |
| wt69.70_wt_Cy3.5 | 0.6%<br>(n=1/167)    | 100%<br>(n=39/39)  | 97%<br>(n=1704/1757)   | 98.8%<br>(n=80/81) | 0%<br>(n=0/17)    | 95.8%<br>(n=23/24) | 100%<br>(n=22/22)  | 95.2%<br>(n=923/970) |
| K417N_FWD_V2     | 99.4%<br>(n=169/170) | 100%<br>(n=39/39)  | 99.6%<br>(n=2109/2118) | 97.6%<br>(n=81/83) | 100%<br>(n=14/14) | 100%<br>(n=22/22)  | 100%<br>(n=22/22)  | 99.6%<br>(n=989/993) |
| K417N_REV_V2     | 100%<br>(n=172/172)  | 100%<br>(n=38/38)  | 99.5%<br>(n=2109/2120) | 100%<br>(n=83/83)  | 100%<br>(n=18/18) | 95.8%<br>(n=23/24) | 100%<br>(n=22/22)  | 99.9%<br>(n=980/981) |
| K417N_mt_CY5_V4  | 0%<br>(n=0/170)      | 97.4%<br>(n=38/39) | 0%<br>(n=1/2120)       | 0%<br>(n=0/82)     | 100%<br>(n=14/14) | 0%<br>(n=0/22)     | 0%<br>(n=0/22)     | 0.2%<br>(n=2/986)    |
| T478K_FWD        | 97.6%<br>(n=162/166) | 100%<br>(n=36/36)  | 99.6%<br>(n=2081/2090) | 97.5%<br>(n=79/81) | 100%<br>(n=18/18) | 0%<br>(n=0/24)     | 100%<br>(n=22/22)  | 99.5%<br>(n=944/949) |
| T478K_REV        | 100%<br>(n=164/164)  | 100%<br>(n=35/35)  | 99.7%<br>(n=2081/2088) | 98.8%<br>(n=81/82) | 100%<br>(n=14/14) | 100%<br>(n=22/22)  | 100%<br>(n=22/22)  | 99.7%<br>(n=951/954) |
| T478K_mt_FAM     | 0%<br>(n=0/164)      | 0%<br>(n=0/36)     | 97.9%<br>(n=2049/2092) | 0%<br>(n=0/82)     | 0%<br>(n=0/18)    | 0%<br>(n=0/24)     | 0%<br>(n=0/22)     | 7.7%<br>(n=73/949)   |

92

93 **Supplemental Figure 2.** Flow chart of specimens sent for nucleic acid amplification tests (NAAT) during  
 94 the initial study period and number of specimens ultimately genotyped by the two-reaction multiplex RT-  
 95 qPCR and sequenced.  
 96

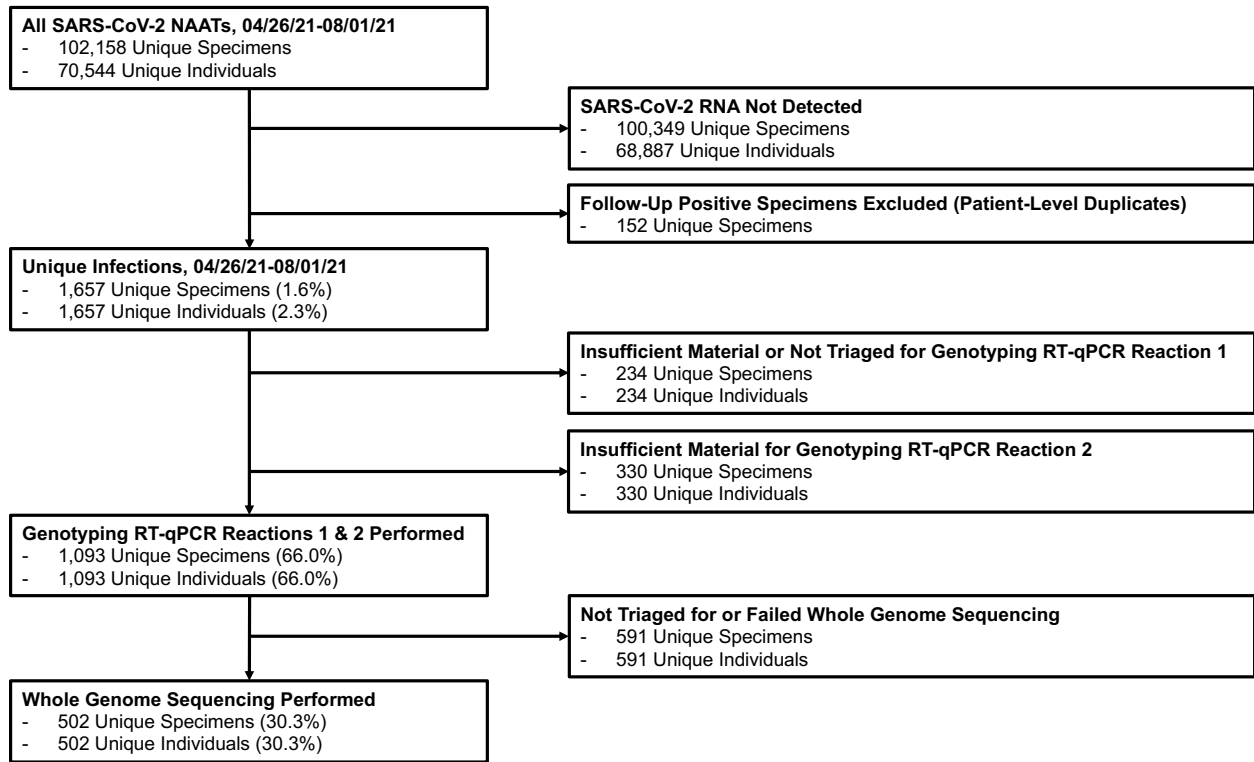

97  
 98  
 99

100 **Supplemental Table 1.** Sequences of Mutant Oligonucleotide Controls

| Name <sup>a</sup> | Position and base change <sup>b</sup> | Length (bp) | Sequence (5' → 3')                                                                                                                         |
|-------------------|---------------------------------------|-------------|--------------------------------------------------------------------------------------------------------------------------------------------|
| ssDNA_L452R_MT    | 22917 T>G                             | 79          | CTCTCTCAAAGGTTTGGAGATTAGACTTCCTAAACAATCTATACCGGTAAT<br>TATAATTACCACCAACCTTAGAATCAAG                                                        |
| ssDNA_del69-70_MT | del21765-70                           | 113         | ACATTCAACTCAGGACTTGTTCTTACCTTTCTTTCCAATGTTACTTGGTT<br>CCATGCTATCTCTGGGACCAATGGTACTAAGAGGTTTGATAACCCTGTCC<br>TACCATTTAATG                   |
| ssDNA_K417N_MT    | 22813G>T                              | 101         | CATTTGTAATTAGAGGTGATGAAGTCAGACAAATCGCTCCAGGGCAAAC<br>GGAAATATTGCTGATTATAATTATAAATTACCAGATGATTTTACAGGCTGC                                   |
| ssDNA_T478K_MT    | 22995 C>A                             | 117         | ATTGTAAAGGAAAGTAACAATTAACCTTCAACACCATTACAAGGTTTGC<br>TACCGGCTGATAGATTTTCAGTTGAAATATCTCTCTCAAAGGTTTGAGA<br>TTAGACTTCCTAAACA                 |
| ssDNA_E484K_MT    | 23012G>A                              | 133         | CTGAAATCTATCAGGCCGGTAGCACACCTTGAATGGTGTAAAGGTTTT<br>AATTGTTACTTTCTTTACAATCATATGGTTTCCAACCCACTTATGGTGTT<br>GGTTACCAACCATACAGAGTAGTAGTACTTTT |
| ssDNA_N501Y_MT    | 23063A>T                              | 134         | GTTTAATTGTTACTTTCTTTACAATCATATGGTTTCCAACCCACTTATG<br>GTGTTGGTTACCAACCATACAGAGTAGTAGTACTTTCTTTGAACTTCTAC<br>ATGCACCAGCAACTGTTGTGGACCTAAAAAG |

MT, mutant; bp, base pairs

<sup>a</sup> Individual ssDNA oligonucleotides were pooled in equimolar ratios diluted to 10<sup>4</sup> copies/μL each in Tris-EDTA buffer to create the mutant control.

<sup>b</sup> Position and sequence based on Genbank NC\_045512

102 **Supplemental Table 2.** Lower Limit of Detection for Reaction 2 mutation targets  
 103

| Concentration<br>(copies/ $\mu$ L template) | Number of Detected Replicates |                         |                      |
|---------------------------------------------|-------------------------------|-------------------------|----------------------|
|                                             | del69-70-mt (HEX)             | K417N-mt (CY5)          | T478K-mt (FAM)       |
| 1.0                                         | 5/20                          | 6/20                    | 10/20                |
| 5.0                                         | 12/20                         | 13/20                   | 20/20                |
| 10.0                                        | 16/20                         | 15/20                   | 20/20                |
| 100.0                                       | 20/20                         | 20/20                   | 20/20                |
| <b>95% LLOD (95% CI)</b>                    | <b>14.8 (10.5-27.2)</b>       | <b>16.4 (11.3-44.3)</b> | <b>2.1 (2.1-8.1)</b> |

104  
 105



106  
107

**Supplemental Table 3.** GISAID Accession Numbers for Sequenced Study Samples (n=547)

| <b>Predicted Variant Type by Genotyping RT-qPCR</b> | <b>Variant Type by Whole Genome Sequencing</b> | <b>PANGO Lineage<sup>a</sup></b> | <b>GISAID Accession</b> |
|-----------------------------------------------------|------------------------------------------------|----------------------------------|-------------------------|
| Alpha                                               | Alpha                                          | B.1.1.7                          | EPI_ISL_3050185         |
| Alpha                                               | Alpha                                          | B.1.1.7                          | EPI_ISL_3050188         |
| Alpha                                               | Alpha                                          | B.1.1.7                          | EPI_ISL_3050190         |
| Alpha                                               | Alpha                                          | B.1.1.7                          | EPI_ISL_3050194         |
| Alpha                                               | Alpha                                          | B.1.1.7                          | EPI_ISL_3050198         |
| Alpha                                               | Alpha                                          | B.1.1.7                          | EPI_ISL_3050205         |
| Alpha                                               | Alpha                                          | B.1.1.7                          | EPI_ISL_3050207         |
| Alpha                                               | Alpha                                          | B.1.1.7                          | EPI_ISL_4072053         |
| Alpha                                               | Alpha                                          | B.1.1.7                          | EPI_ISL_4072055         |
| Alpha                                               | Alpha                                          | B.1.1.7                          | EPI_ISL_4072056         |
| Alpha                                               | Alpha                                          | B.1.1.7                          | EPI_ISL_4072057         |
| Alpha                                               | Alpha                                          | B.1.1.7                          | EPI_ISL_4072058         |
| Alpha                                               | Alpha                                          | B.1.1.7                          | EPI_ISL_4072059         |
| Alpha                                               | Alpha                                          | B.1.1.7                          | EPI_ISL_4072060         |
| Alpha                                               | Alpha                                          | B.1.1.7                          | EPI_ISL_4072061         |
| Alpha                                               | Alpha                                          | B.1.1.7                          | EPI_ISL_4072062         |
| Alpha                                               | Alpha                                          | B.1.1.7                          | EPI_ISL_4072063         |
| Alpha                                               | Alpha                                          | B.1.1.7                          | EPI_ISL_4072064         |
| Alpha                                               | Alpha                                          | B.1.1.7                          | EPI_ISL_4072065         |
| Alpha                                               | Alpha                                          | B.1.1.7                          | EPI_ISL_4072068         |
| Alpha                                               | Alpha                                          | B.1.1.7                          | EPI_ISL_4072069         |
| Alpha                                               | Alpha                                          | B.1.1.7                          | EPI_ISL_4496848         |
| Alpha                                               | Alpha                                          | B.1.1.7                          | EPI_ISL_4496849         |
| Alpha                                               | Alpha                                          | B.1.1.7                          | EPI_ISL_4496850         |
| Alpha                                               | Alpha                                          | B.1.1.7                          | EPI_ISL_4496851         |
| Alpha                                               | Alpha                                          | B.1.1.7                          | EPI_ISL_4496857         |
| Alpha                                               | Alpha                                          | B.1.1.7                          | EPI_ISL_4496858         |
| Alpha                                               | Alpha                                          | B.1.1.7                          | EPI_ISL_4496860         |
| Alpha                                               | Alpha                                          | B.1.1.7                          | EPI_ISL_4496861         |
| Alpha                                               | Alpha                                          | B.1.1.7                          | EPI_ISL_4496865         |
| Alpha                                               | Alpha                                          | B.1.1.7                          | EPI_ISL_4496867         |
| Alpha                                               | Alpha                                          | B.1.1.7                          | EPI_ISL_4496868         |
| Alpha                                               | Alpha                                          | B.1.1.7                          | EPI_ISL_4496905         |
| Alpha                                               | Alpha                                          | B.1.1.7                          | EPI_ISL_4496906         |
| Alpha                                               | Alpha                                          | B.1.1.7                          | EPI_ISL_4496907         |
| Alpha                                               | Alpha                                          | B.1.1.7                          | EPI_ISL_4496908         |
| Alpha                                               | Alpha                                          | B.1.1.7                          | EPI_ISL_4496909         |
| Alpha                                               | Alpha                                          | Q.3                              | EPI_ISL_3050181         |
| Alpha                                               | Alpha                                          | Q.3                              | EPI_ISL_3050189         |
| Alpha                                               | Alpha                                          | Q.3                              | EPI_ISL_4072066         |
| Alpha                                               | Alpha                                          | Q.3                              | EPI_ISL_4072067         |
| Alpha                                               | Alpha                                          | Q.3                              | EPI_ISL_4072071         |
| Alpha                                               | Alpha                                          | Q.3                              | EPI_ISL_4072072         |
| Beta                                                | Beta                                           | B.1.351                          | EPI_ISL_4496869         |
| Beta                                                | Beta                                           | B.1.351                          | EPI_ISL_4496898         |
| Beta                                                | Not a VOC                                      | B.1.621                          | EPI_ISL_3236162         |
| Delta                                               | Delta                                          | AY.1                             | EPI_ISL_2987140         |
| Delta                                               | Delta                                          | AY.1                             | EPI_ISL_2987141         |
| Delta                                               | Delta                                          | AY.1                             | EPI_ISL_2987142         |
| Delta                                               | Delta                                          | AY.1                             | EPI_ISL_3050224         |
| Delta                                               | Delta                                          | AY.1                             | EPI_ISL_3236110         |
| Delta                                               | Delta                                          | AY.1                             | EPI_ISL_3236112         |

|       |       |          |                 |
|-------|-------|----------|-----------------|
| Delta | Delta | AY.1     | EPI_ISL_3236124 |
| Delta | Delta | AY.1     | EPI_ISL_3236131 |
| Delta | Delta | AY.1     | EPI_ISL_3236146 |
| Delta | Delta | AY.1     | EPI_ISL_3236161 |
| Delta | Delta | AY.1     | EPI_ISL_3236167 |
| Delta | Delta | AY.1     | EPI_ISL_3390756 |
| Delta | Delta | AY.1     | EPI_ISL_3916305 |
| Delta | Delta | AY.1     | EPI_ISL_3916308 |
| Delta | Delta | AY.1     | EPI_ISL_3916328 |
| Delta | Delta | AY.1     | EPI_ISL_3916330 |
| Delta | Delta | AY.1     | EPI_ISL_3916341 |
| Delta | Delta | AY.1     | EPI_ISL_3916368 |
| Delta | Delta | AY.1     | EPI_ISL_3916373 |
| Delta | Delta | AY.1     | EPI_ISL_3916390 |
| Delta | Delta | AY.100   | EPI_ISL_3390725 |
| Delta | Delta | AY.100   | EPI_ISL_3538733 |
| Delta | Delta | AY.100   | EPI_ISL_3916354 |
| Delta | Delta | AY.103   | EPI_ISL_3050256 |
| Delta | Delta | AY.103   | EPI_ISL_3236104 |
| Delta | Delta | AY.103   | EPI_ISL_3236145 |
| Delta | Delta | AY.103   | EPI_ISL_3390747 |
| Delta | Delta | AY.103   | EPI_ISL_3538732 |
| Delta | Delta | AY.103   | EPI_ISL_3538737 |
| Delta | Delta | AY.103   | EPI_ISL_3538762 |
| Delta | Delta | AY.103   | EPI_ISL_3538764 |
| Delta | Delta | AY.103   | EPI_ISL_3538768 |
| Delta | Delta | AY.103   | EPI_ISL_3722174 |
| Delta | Delta | AY.103   | EPI_ISL_3722189 |
| Delta | Delta | AY.103   | EPI_ISL_3722193 |
| Delta | Delta | AY.103   | EPI_ISL_3722208 |
| Delta | Delta | AY.103   | EPI_ISL_3916283 |
| Delta | Delta | AY.103   | EPI_ISL_3916287 |
| Delta | Delta | AY.103   | EPI_ISL_3916294 |
| Delta | Delta | AY.103   | EPI_ISL_3916312 |
| Delta | Delta | AY.103   | EPI_ISL_3916320 |
| Delta | Delta | AY.103   | EPI_ISL_3916339 |
| Delta | Delta | AY.103   | EPI_ISL_3916345 |
| Delta | Delta | AY.103   | EPI_ISL_3916349 |
| Delta | Delta | AY.103   | EPI_ISL_3916351 |
| Delta | Delta | AY.103   | EPI_ISL_3916362 |
| Delta | Delta | AY.103   | EPI_ISL_3916366 |
| Delta | Delta | AY.103   | EPI_ISL_3916367 |
| Delta | Delta | AY.103   | EPI_ISL_3916391 |
| Delta | Delta | AY.110   | EPI_ISL_3050183 |
| Delta | Delta | AY.110   | EPI_ISL_3236144 |
| Delta | Delta | AY.110   | EPI_ISL_3236164 |
| Delta | Delta | AY.110   | EPI_ISL_3236165 |
| Delta | Delta | AY.110   | EPI_ISL_3236171 |
| Delta | Delta | AY.110   | EPI_ISL_3390748 |
| Delta | Delta | AY.110   | EPI_ISL_3538729 |
| Delta | Delta | AY.110   | EPI_ISL_4072017 |
| Delta | Delta | AY.110   | EPI_ISL_4496828 |
| Delta | Delta | AY.114   | EPI_ISL_3722179 |
| Delta | Delta | AY.116.1 | EPI_ISL_3236127 |
| Delta | Delta | AY.116.1 | EPI_ISL_3538748 |
| Delta | Delta | AY.118   | EPI_ISL_3050199 |

|       |       |          |                 |
|-------|-------|----------|-----------------|
| Delta | Delta | AY.118   | EPI_ISL_3050208 |
| Delta | Delta | AY.118   | EPI_ISL_3236107 |
| Delta | Delta | AY.118   | EPI_ISL_3236169 |
| Delta | Delta | AY.118   | EPI_ISL_3916369 |
| Delta | Delta | AY.119   | EPI_ISL_3236172 |
| Delta | Delta | AY.119   | EPI_ISL_3722212 |
| Delta | Delta | AY.119   | EPI_ISL_3916299 |
| Delta | Delta | AY.119   | EPI_ISL_4072028 |
| Delta | Delta | AY.120.1 | EPI_ISL_3916300 |
| Delta | Delta | AY.121   | EPI_ISL_3236111 |
| Delta | Delta | AY.121   | EPI_ISL_3236115 |
| Delta | Delta | AY.121   | EPI_ISL_3538735 |
| Delta | Delta | AY.122   | EPI_ISL_3236149 |
| Delta | Delta | AY.122   | EPI_ISL_3236181 |
| Delta | Delta | AY.122   | EPI_ISL_3916311 |
| Delta | Delta | AY.122   | EPI_ISL_4496829 |
| Delta | Delta | AY.122   | EPI_ISL_4496830 |
| Delta | Delta | AY.126   | EPI_ISL_3050182 |
| Delta | Delta | AY.126   | EPI_ISL_3236175 |
| Delta | Delta | AY.13    | EPI_ISL_3050253 |
| Delta | Delta | AY.13    | EPI_ISL_3236106 |
| Delta | Delta | AY.13    | EPI_ISL_3236109 |
| Delta | Delta | AY.13    | EPI_ISL_3236113 |
| Delta | Delta | AY.13    | EPI_ISL_3236114 |
| Delta | Delta | AY.13    | EPI_ISL_3236130 |
| Delta | Delta | AY.13    | EPI_ISL_3236141 |
| Delta | Delta | AY.13    | EPI_ISL_3236156 |
| Delta | Delta | AY.13    | EPI_ISL_3236158 |
| Delta | Delta | AY.13    | EPI_ISL_3236160 |
| Delta | Delta | AY.13    | EPI_ISL_3236179 |
| Delta | Delta | AY.13    | EPI_ISL_3236180 |
| Delta | Delta | AY.13    | EPI_ISL_3236183 |
| Delta | Delta | AY.13    | EPI_ISL_3236185 |
| Delta | Delta | AY.13    | EPI_ISL_3390740 |
| Delta | Delta | AY.13    | EPI_ISL_3390743 |
| Delta | Delta | AY.13    | EPI_ISL_3390744 |
| Delta | Delta | AY.13    | EPI_ISL_3538753 |
| Delta | Delta | AY.13    | EPI_ISL_3538754 |
| Delta | Delta | AY.13    | EPI_ISL_3538756 |
| Delta | Delta | AY.13    | EPI_ISL_3722199 |
| Delta | Delta | AY.13    | EPI_ISL_3916270 |
| Delta | Delta | AY.13    | EPI_ISL_3916319 |
| Delta | Delta | AY.13    | EPI_ISL_3916353 |
| Delta | Delta | AY.13    | EPI_ISL_3916386 |
| Delta | Delta | AY.13    | EPI_ISL_4072014 |
| Delta | Delta | AY.13    | EPI_ISL_4072016 |
| Delta | Delta | AY.13    | EPI_ISL_4072024 |
| Delta | Delta | AY.13    | EPI_ISL_4072025 |
| Delta | Delta | AY.13    | EPI_ISL_4072026 |
| Delta | Delta | AY.13    | EPI_ISL_4496853 |
| Delta | Delta | AY.13    | EPI_ISL_4496885 |
| Delta | Delta | AY.14    | EPI_ISL_3050184 |
| Delta | Delta | AY.14    | EPI_ISL_3050195 |
| Delta | Delta | AY.14    | EPI_ISL_3050196 |
| Delta | Delta | AY.14    | EPI_ISL_3050201 |
| Delta | Delta | AY.14    | EPI_ISL_3050202 |

|       |       |       |                 |
|-------|-------|-------|-----------------|
| Delta | Delta | AY.14 | EPI_ISL_3050211 |
| Delta | Delta | AY.14 | EPI_ISL_3236105 |
| Delta | Delta | AY.14 | EPI_ISL_3236108 |
| Delta | Delta | AY.14 | EPI_ISL_3236117 |
| Delta | Delta | AY.14 | EPI_ISL_3236119 |
| Delta | Delta | AY.14 | EPI_ISL_3236121 |
| Delta | Delta | AY.14 | EPI_ISL_3236123 |
| Delta | Delta | AY.14 | EPI_ISL_3236125 |
| Delta | Delta | AY.14 | EPI_ISL_3236134 |
| Delta | Delta | AY.14 | EPI_ISL_3236135 |
| Delta | Delta | AY.14 | EPI_ISL_3236138 |
| Delta | Delta | AY.14 | EPI_ISL_3236148 |
| Delta | Delta | AY.14 | EPI_ISL_3236174 |
| Delta | Delta | AY.14 | EPI_ISL_3236177 |
| Delta | Delta | AY.14 | EPI_ISL_3390726 |
| Delta | Delta | AY.14 | EPI_ISL_3390732 |
| Delta | Delta | AY.14 | EPI_ISL_3390734 |
| Delta | Delta | AY.14 | EPI_ISL_3390737 |
| Delta | Delta | AY.14 | EPI_ISL_3390753 |
| Delta | Delta | AY.14 | EPI_ISL_3538738 |
| Delta | Delta | AY.14 | EPI_ISL_3538739 |
| Delta | Delta | AY.14 | EPI_ISL_3538741 |
| Delta | Delta | AY.14 | EPI_ISL_3538744 |
| Delta | Delta | AY.14 | EPI_ISL_3538750 |
| Delta | Delta | AY.14 | EPI_ISL_3538751 |
| Delta | Delta | AY.14 | EPI_ISL_3538757 |
| Delta | Delta | AY.14 | EPI_ISL_3538760 |
| Delta | Delta | AY.14 | EPI_ISL_3538766 |
| Delta | Delta | AY.14 | EPI_ISL_3722184 |
| Delta | Delta | AY.14 | EPI_ISL_3722185 |
| Delta | Delta | AY.14 | EPI_ISL_3722186 |
| Delta | Delta | AY.14 | EPI_ISL_3722187 |
| Delta | Delta | AY.14 | EPI_ISL_3722194 |
| Delta | Delta | AY.14 | EPI_ISL_3722196 |
| Delta | Delta | AY.14 | EPI_ISL_3722197 |
| Delta | Delta | AY.14 | EPI_ISL_3722200 |
| Delta | Delta | AY.14 | EPI_ISL_3916275 |
| Delta | Delta | AY.14 | EPI_ISL_3916296 |
| Delta | Delta | AY.14 | EPI_ISL_3916298 |
| Delta | Delta | AY.14 | EPI_ISL_3916309 |
| Delta | Delta | AY.14 | EPI_ISL_3916322 |
| Delta | Delta | AY.14 | EPI_ISL_3916323 |
| Delta | Delta | AY.14 | EPI_ISL_3916327 |
| Delta | Delta | AY.14 | EPI_ISL_3916336 |
| Delta | Delta | AY.14 | EPI_ISL_3916350 |
| Delta | Delta | AY.14 | EPI_ISL_3916357 |
| Delta | Delta | AY.14 | EPI_ISL_3916365 |
| Delta | Delta | AY.14 | EPI_ISL_3916370 |
| Delta | Delta | AY.14 | EPI_ISL_3916371 |
| Delta | Delta | AY.14 | EPI_ISL_3916372 |
| Delta | Delta | AY.14 | EPI_ISL_3916377 |
| Delta | Delta | AY.14 | EPI_ISL_3916383 |
| Delta | Delta | AY.14 | EPI_ISL_3916385 |
| Delta | Delta | AY.14 | EPI_ISL_4072027 |
| Delta | Delta | AY.19 | EPI_ISL_3916364 |
| Delta | Delta | AY.2  | EPI_ISL_3050234 |

|       |       |         |                 |
|-------|-------|---------|-----------------|
| Delta | Delta | AY.2    | EPI_ISL_3050247 |
| Delta | Delta | AY.2    | EPI_ISL_3236142 |
| Delta | Delta | AY.2    | EPI_ISL_3236159 |
| Delta | Delta | AY.2    | EPI_ISL_3390749 |
| Delta | Delta | AY.20   | EPI_ISL_3236129 |
| Delta | Delta | AY.20   | EPI_ISL_3538740 |
| Delta | Delta | AY.20   | EPI_ISL_3916290 |
| Delta | Delta | AY.20   | EPI_ISL_3916335 |
| Delta | Delta | AY.20   | EPI_ISL_3916375 |
| Delta | Delta | AY.23   | EPI_ISL_3390755 |
| Delta | Delta | AY.25   | EPI_ISL_3050252 |
| Delta | Delta | AY.25   | EPI_ISL_3236184 |
| Delta | Delta | AY.25   | EPI_ISL_3390758 |
| Delta | Delta | AY.25   | EPI_ISL_3538736 |
| Delta | Delta | AY.25   | EPI_ISL_3722205 |
| Delta | Delta | AY.25   | EPI_ISL_3916276 |
| Delta | Delta | AY.25   | EPI_ISL_3916352 |
| Delta | Delta | AY.25.1 | EPI_ISL_3236133 |
| Delta | Delta | AY.25.1 | EPI_ISL_3236137 |
| Delta | Delta | AY.25.1 | EPI_ISL_3390730 |
| Delta | Delta | AY.25.1 | EPI_ISL_3390745 |
| Delta | Delta | AY.25.1 | EPI_ISL_3390746 |
| Delta | Delta | AY.25.1 | EPI_ISL_3390750 |
| Delta | Delta | AY.25.1 | EPI_ISL_3390751 |
| Delta | Delta | AY.25.1 | EPI_ISL_3390752 |
| Delta | Delta | AY.25.1 | EPI_ISL_3538730 |
| Delta | Delta | AY.25.1 | EPI_ISL_3538765 |
| Delta | Delta | AY.25.1 | EPI_ISL_3722206 |
| Delta | Delta | AY.25.1 | EPI_ISL_3916269 |
| Delta | Delta | AY.25.1 | EPI_ISL_3916272 |
| Delta | Delta | AY.25.1 | EPI_ISL_3916278 |
| Delta | Delta | AY.25.1 | EPI_ISL_3916304 |
| Delta | Delta | AY.25.1 | EPI_ISL_3916310 |
| Delta | Delta | AY.25.1 | EPI_ISL_3916314 |
| Delta | Delta | AY.25.1 | EPI_ISL_3916324 |
| Delta | Delta | AY.25.1 | EPI_ISL_3916325 |
| Delta | Delta | AY.25.1 | EPI_ISL_3916333 |
| Delta | Delta | AY.25.1 | EPI_ISL_3916334 |
| Delta | Delta | AY.25.1 | EPI_ISL_3916338 |
| Delta | Delta | AY.25.1 | EPI_ISL_3916347 |
| Delta | Delta | AY.25.1 | EPI_ISL_3916358 |
| Delta | Delta | AY.25.1 | EPI_ISL_3916389 |
| Delta | Delta | AY.26   | EPI_ISL_3050193 |
| Delta | Delta | AY.26   | EPI_ISL_3050246 |
| Delta | Delta | AY.26   | EPI_ISL_3236136 |
| Delta | Delta | AY.26   | EPI_ISL_3236178 |
| Delta | Delta | AY.26   | EPI_ISL_3390731 |
| Delta | Delta | AY.26   | EPI_ISL_3390735 |
| Delta | Delta | AY.26   | EPI_ISL_3390754 |
| Delta | Delta | AY.26   | EPI_ISL_3722182 |
| Delta | Delta | AY.26   | EPI_ISL_3722192 |
| Delta | Delta | AY.26   | EPI_ISL_3722201 |
| Delta | Delta | AY.26   | EPI_ISL_3722209 |
| Delta | Delta | AY.26   | EPI_ISL_3722210 |
| Delta | Delta | AY.26   | EPI_ISL_3916297 |
| Delta | Delta | AY.26   | EPI_ISL_3916301 |

|       |       |       |                 |
|-------|-------|-------|-----------------|
| Delta | Delta | AY.26 | EPI_ISL_4072040 |
| Delta | Delta | AY.3  | EPI_ISL_3538763 |
| Delta | Delta | AY.3  | EPI_ISL_3722190 |
| Delta | Delta | AY.3  | EPI_ISL_3916280 |
| Delta | Delta | AY.3  | EPI_ISL_3916302 |
| Delta | Delta | AY.3  | EPI_ISL_3916376 |
| Delta | Delta | AY.35 | EPI_ISL_3236173 |
| Delta | Delta | AY.35 | EPI_ISL_3236176 |
| Delta | Delta | AY.4  | EPI_ISL_3916286 |
| Delta | Delta | AY.43 | EPI_ISL_3916342 |
| Delta | Delta | AY.43 | EPI_ISL_3916388 |
| Delta | Delta | AY.44 | EPI_ISL_3050200 |
| Delta | Delta | AY.44 | EPI_ISL_3236102 |
| Delta | Delta | AY.44 | EPI_ISL_3236103 |
| Delta | Delta | AY.44 | EPI_ISL_3236116 |
| Delta | Delta | AY.44 | EPI_ISL_3236118 |
| Delta | Delta | AY.44 | EPI_ISL_3236120 |
| Delta | Delta | AY.44 | EPI_ISL_3236128 |
| Delta | Delta | AY.44 | EPI_ISL_3236153 |
| Delta | Delta | AY.44 | EPI_ISL_3236154 |
| Delta | Delta | AY.44 | EPI_ISL_3236155 |
| Delta | Delta | AY.44 | EPI_ISL_3236166 |
| Delta | Delta | AY.44 | EPI_ISL_3390728 |
| Delta | Delta | AY.44 | EPI_ISL_3390729 |
| Delta | Delta | AY.44 | EPI_ISL_3390736 |
| Delta | Delta | AY.44 | EPI_ISL_3390739 |
| Delta | Delta | AY.44 | EPI_ISL_3390741 |
| Delta | Delta | AY.44 | EPI_ISL_3390742 |
| Delta | Delta | AY.44 | EPI_ISL_3538728 |
| Delta | Delta | AY.44 | EPI_ISL_3538731 |
| Delta | Delta | AY.44 | EPI_ISL_3538734 |
| Delta | Delta | AY.44 | EPI_ISL_3538743 |
| Delta | Delta | AY.44 | EPI_ISL_3538745 |
| Delta | Delta | AY.44 | EPI_ISL_3538747 |
| Delta | Delta | AY.44 | EPI_ISL_3538749 |
| Delta | Delta | AY.44 | EPI_ISL_3538755 |
| Delta | Delta | AY.44 | EPI_ISL_3538758 |
| Delta | Delta | AY.44 | EPI_ISL_3538759 |
| Delta | Delta | AY.44 | EPI_ISL_3538761 |
| Delta | Delta | AY.44 | EPI_ISL_3538767 |
| Delta | Delta | AY.44 | EPI_ISL_3722175 |
| Delta | Delta | AY.44 | EPI_ISL_3722177 |
| Delta | Delta | AY.44 | EPI_ISL_3722180 |
| Delta | Delta | AY.44 | EPI_ISL_3722181 |
| Delta | Delta | AY.44 | EPI_ISL_3722183 |
| Delta | Delta | AY.44 | EPI_ISL_3722188 |
| Delta | Delta | AY.44 | EPI_ISL_3722191 |
| Delta | Delta | AY.44 | EPI_ISL_3722195 |
| Delta | Delta | AY.44 | EPI_ISL_3722202 |
| Delta | Delta | AY.44 | EPI_ISL_3722203 |
| Delta | Delta | AY.44 | EPI_ISL_3722204 |
| Delta | Delta | AY.44 | EPI_ISL_3722211 |
| Delta | Delta | AY.44 | EPI_ISL_3722214 |
| Delta | Delta | AY.44 | EPI_ISL_3916264 |
| Delta | Delta | AY.44 | EPI_ISL_3916266 |
| Delta | Delta | AY.44 | EPI_ISL_3916267 |

|       |       |         |                 |
|-------|-------|---------|-----------------|
| Delta | Delta | AY.44   | EPI_ISL_3916268 |
| Delta | Delta | AY.44   | EPI_ISL_3916271 |
| Delta | Delta | AY.44   | EPI_ISL_3916273 |
| Delta | Delta | AY.44   | EPI_ISL_3916274 |
| Delta | Delta | AY.44   | EPI_ISL_3916279 |
| Delta | Delta | AY.44   | EPI_ISL_3916282 |
| Delta | Delta | AY.44   | EPI_ISL_3916285 |
| Delta | Delta | AY.44   | EPI_ISL_3916288 |
| Delta | Delta | AY.44   | EPI_ISL_3916289 |
| Delta | Delta | AY.44   | EPI_ISL_3916291 |
| Delta | Delta | AY.44   | EPI_ISL_3916295 |
| Delta | Delta | AY.44   | EPI_ISL_3916313 |
| Delta | Delta | AY.44   | EPI_ISL_3916317 |
| Delta | Delta | AY.44   | EPI_ISL_3916318 |
| Delta | Delta | AY.44   | EPI_ISL_3916321 |
| Delta | Delta | AY.44   | EPI_ISL_3916329 |
| Delta | Delta | AY.44   | EPI_ISL_3916331 |
| Delta | Delta | AY.44   | EPI_ISL_3916332 |
| Delta | Delta | AY.44   | EPI_ISL_3916337 |
| Delta | Delta | AY.44   | EPI_ISL_3916343 |
| Delta | Delta | AY.44   | EPI_ISL_3916344 |
| Delta | Delta | AY.44   | EPI_ISL_3916346 |
| Delta | Delta | AY.44   | EPI_ISL_3916359 |
| Delta | Delta | AY.44   | EPI_ISL_3916361 |
| Delta | Delta | AY.44   | EPI_ISL_3916363 |
| Delta | Delta | AY.44   | EPI_ISL_3916374 |
| Delta | Delta | AY.44   | EPI_ISL_3916379 |
| Delta | Delta | AY.44   | EPI_ISL_3916381 |
| Delta | Delta | AY.44   | EPI_ISL_3916384 |
| Delta | Delta | AY.44   | EPI_ISL_3916387 |
| Delta | Delta | AY.44   | EPI_ISL_4072015 |
| Delta | Delta | AY.44   | EPI_ISL_4072018 |
| Delta | Delta | AY.46.2 | EPI_ISL_3916303 |
| Delta | Delta | AY.47   | EPI_ISL_3390724 |
| Delta | Delta | AY.47   | EPI_ISL_3722213 |
| Delta | Delta | AY.47   | EPI_ISL_3916265 |
| Delta | Delta | AY.47   | EPI_ISL_3916356 |
| Delta | Delta | AY.47   | EPI_ISL_3916360 |
| Delta | Delta | AY.47   | EPI_ISL_3916378 |
| Delta | Delta | AY.47   | EPI_ISL_3916380 |
| Delta | Delta | AY.47   | EPI_ISL_3916382 |
| Delta | Delta | AY.48   | EPI_ISL_3916306 |
| Delta | Delta | AY.52   | EPI_ISL_3236163 |
| Delta | Delta | AY.54   | EPI_ISL_3390733 |
| Delta | Delta | AY.54   | EPI_ISL_3722178 |
| Delta | Delta | AY.54   | EPI_ISL_3722207 |
| Delta | Delta | AY.59   | EPI_ISL_4496847 |
| Delta | Delta | AY.62   | EPI_ISL_3236152 |
| Delta | Delta | AY.67   | EPI_ISL_3538752 |
| Delta | Delta | AY.67   | EPI_ISL_3916292 |
| Delta | Delta | AY.67   | EPI_ISL_3916293 |
| Delta | Delta | AY.74   | EPI_ISL_3916281 |
| Delta | Delta | AY.75   | EPI_ISL_3050203 |
| Delta | Delta | AY.75   | EPI_ISL_3236150 |
| Delta | Delta | AY.75   | EPI_ISL_3236151 |
| Delta | Delta | AY.75   | EPI_ISL_3236168 |

|       |           |           |                 |
|-------|-----------|-----------|-----------------|
| Delta | Delta     | AY.75     | EPI_ISL_3236170 |
| Delta | Delta     | AY.75     | EPI_ISL_3236182 |
| Delta | Delta     | AY.75     | EPI_ISL_3390738 |
| Delta | Delta     | AY.75     | EPI_ISL_3538742 |
| Delta | Delta     | AY.75     | EPI_ISL_3916284 |
| Delta | Delta     | AY.75     | EPI_ISL_4072019 |
| Delta | Delta     | AY.98.1   | EPI_ISL_3916392 |
| Delta | Delta     | B.1.617.2 | EPI_ISL_2457061 |
| Delta | Delta     | B.1.617.2 | EPI_ISL_3050180 |
| Delta | Delta     | B.1.617.2 | EPI_ISL_3050191 |
| Delta | Delta     | B.1.617.2 | EPI_ISL_3050204 |
| Delta | Delta     | B.1.617.2 | EPI_ISL_3236139 |
| Delta | Delta     | B.1.617.2 | EPI_ISL_3236143 |
| Delta | Delta     | B.1.617.2 | EPI_ISL_3722173 |
| Delta | Delta     | B.1.617.2 | EPI_ISL_3722176 |
| Delta | Delta     | B.1.617.2 | EPI_ISL_3916277 |
| Delta | Delta     | B.1.617.2 | EPI_ISL_3916307 |
| Delta | Delta     | B.1.617.2 | EPI_ISL_3916326 |
| Delta | Delta     | B.1.617.2 | EPI_ISL_3916355 |
| Delta | Delta     | B.1.617.2 | EPI_ISL_4072013 |
| Delta | Delta     | B.1.617.2 | EPI_ISL_4072020 |
| Delta | Delta     | B.1.617.2 | EPI_ISL_4072021 |
| Delta | Delta     | B.1.617.2 | EPI_ISL_4072022 |
| Delta | Delta     | B.1.617.2 | EPI_ISL_4072023 |
| Delta | Delta     | B.1.617.2 | EPI_ISL_4496821 |
| Delta | Delta     | B.1.617.2 | EPI_ISL_4496831 |
| Delta | Delta     | B.1.617.2 | EPI_ISL_4496832 |
| Delta | Delta     | B.1.617.2 | EPI_ISL_4496833 |
| Delta | Delta     | B.1.617.2 | EPI_ISL_4496846 |
| Delta | Delta     | B.1.617.2 | EPI_ISL_4496855 |
| Delta | Delta     | B.1.617.2 | EPI_ISL_4496874 |
| Delta | Delta     | B.1.617.2 | EPI_ISL_4496880 |
| Delta | Delta     | B.1.617.2 | EPI_ISL_4496888 |
| Delta | Delta     | B.1.617.2 | EPI_ISL_4496890 |
| Delta | Delta     | B.1.617.2 | EPI_ISL_4496891 |
| Delta | Delta     | B.1.617.2 | EPI_ISL_4496892 |
| Gamma | Not a VOC | B.1.621   | EPI_ISL_3236157 |
| Gamma | Not a VOC | B.1.621   | EPI_ISL_4496900 |
| Gamma | Not a VOC | BB.2      | EPI_ISL_3390723 |
| Gamma | Not a VOC | BB.2      | EPI_ISL_3390757 |
| Gamma | Gamma     | P.1       | EPI_ISL_3050186 |
| Gamma | Gamma     | P.1       | EPI_ISL_3050210 |
| Gamma | Gamma     | P.1       | EPI_ISL_3538746 |
| Gamma | Gamma     | P.1       | EPI_ISL_3916315 |
| Gamma | Gamma     | P.1       | EPI_ISL_4072051 |
| Gamma | Gamma     | P.1       | EPI_ISL_4072052 |
| Gamma | Gamma     | P.1       | EPI_ISL_4072073 |
| Gamma | Gamma     | P.1       | EPI_ISL_4496811 |
| Gamma | Gamma     | P.1       | EPI_ISL_4496812 |
| Gamma | Gamma     | P.1       | EPI_ISL_4496813 |
| Gamma | Gamma     | P.1       | EPI_ISL_4496815 |
| Gamma | Gamma     | P.1       | EPI_ISL_4496816 |
| Gamma | Gamma     | P.1       | EPI_ISL_4496875 |
| Gamma | Gamma     | P.1.10    | EPI_ISL_3050249 |
| Gamma | Gamma     | P.1.10    | EPI_ISL_4496856 |
| Gamma | Gamma     | P.1.10    | EPI_ISL_4496866 |



|           |           |           |                 |
|-----------|-----------|-----------|-----------------|
| Gamma     | Gamma     | P.1.10    | EPI_ISL_4496871 |
| Gamma     | Gamma     | P.1.10    | EPI_ISL_4496883 |
| Gamma     | Gamma     | P.1.17    | EPI_ISL_4496877 |
| Gamma     | Gamma     | P.1.17    | EPI_ISL_4496901 |
| Not a VOC | Not a VOC | A.2.5     | EPI_ISL_3050209 |
| Not a VOC | Not a VOC | A.2.5     | EPI_ISL_3050212 |
| Not a VOC | Not a VOC | A.2.5     | EPI_ISL_3050213 |
| Not a VOC | Not a VOC | A.2.5     | EPI_ISL_3050214 |
| Not a VOC | Not a VOC | A.2.5     | EPI_ISL_3050251 |
| Not a VOC | Not a VOC | A.2.5     | EPI_ISL_4496879 |
| Not a VOC | Not a VOC | B.1       | EPI_ISL_3050206 |
| Not a VOC | Not a VOC | B.1       | EPI_ISL_3722198 |
| Not a VOC | Not a VOC | B.1       | EPI_ISL_4496826 |
| Not a VOC | Not a VOC | B.1.1.318 | EPI_ISL_4496870 |
| Not a VOC | Not a VOC | B.1.1.519 | EPI_ISL_4496824 |
| Not a VOC | Not a VOC | B.1.311   | EPI_ISL_4072038 |
| Not a VOC | Not a VOC | B.1.427   | EPI_ISL_4496835 |
| Not a VOC | Not a VOC | B.1.427   | EPI_ISL_4496836 |
| Not a VOC | Not a VOC | B.1.427   | EPI_ISL_4496889 |
| Not a VOC | Not a VOC | B.1.429   | EPI_ISL_4496817 |
| Not a VOC | Not a VOC | B.1.429   | EPI_ISL_4496818 |
| Not a VOC | Not a VOC | B.1.429   | EPI_ISL_4496819 |
| Not a VOC | Not a VOC | B.1.429   | EPI_ISL_4496822 |
| Not a VOC | Not a VOC | B.1.429   | EPI_ISL_4496823 |
| Not a VOC | Not a VOC | B.1.429   | EPI_ISL_4496834 |
| Not a VOC | Not a VOC | B.1.429   | EPI_ISL_4496837 |
| Not a VOC | Not a VOC | B.1.429   | EPI_ISL_4496845 |
| Not a VOC | Not a VOC | B.1.526   | EPI_ISL_4496810 |
| Not a VOC | Not a VOC | B.1.526   | EPI_ISL_4496814 |
| Not a VOC | Not a VOC | B.1.526   | EPI_ISL_4496825 |
| Not a VOC | Not a VOC | B.1.526   | EPI_ISL_4496827 |
| Not a VOC | Not a VOC | B.1.526   | EPI_ISL_4496872 |
| Not a VOC | Not a VOC | B.1.526   | EPI_ISL_4496884 |
| Not a VOC | Not a VOC | B.1.526   | EPI_ISL_4496894 |
| Not a VOC | Not a VOC | B.1.526   | EPI_ISL_4496899 |
| Not a VOC | Not a VOC | B.1.526   | EPI_ISL_4496902 |
| Not a VOC | Not a VOC | B.1.526   | EPI_ISL_4496903 |
| Not a VOC | Not a VOC | B.1.627   | EPI_ISL_4496862 |
| Not a VOC | Not a VOC | B.1.637   | EPI_ISL_3050248 |
| Not a VOC | Not a VOC | B.1.637   | EPI_ISL_3236140 |
| Not a VOC | Not a VOC | B.1.637   | EPI_ISL_3390720 |
| Not a VOC | Not a VOC | B.1.637   | EPI_ISL_3390721 |
| Not a VOC | Not a VOC | B.1.637   | EPI_ISL_3390722 |
| Not a VOC | Not a VOC | B.1.637   | EPI_ISL_4496852 |
| Not a VOC | Not a VOC | B.1.637   | EPI_ISL_4496854 |
| Not a VOC | Not a VOC | B.1.637   | EPI_ISL_4496878 |
| Not a VOC | Not a VOC | B.1.637   | EPI_ISL_4496886 |
| Not a VOC | Not a VOC | B.1.637   | EPI_ISL_4496887 |
| Not a VOC | Not a VOC | B.1.637   | EPI_ISL_4496895 |
| Not a VOC | Not a VOC | XB        | EPI_ISL_3050187 |
| Not a VOC | Not a VOC | XB        | EPI_ISL_3050197 |
| Not a VOC | Not a VOC | XB        | EPI_ISL_4072042 |
| Not a VOC | Not a VOC | XB        | EPI_ISL_4072043 |
| Not a VOC | Not a VOC | XB        | EPI_ISL_4496863 |
| Not a VOC | Not a VOC | XB        | EPI_ISL_4496864 |
| Not a VOC | Not a VOC | XB        | EPI_ISL_4496873 |

| Not a VOC<br>Not a VOC | Not a VOC<br>Not a VOC | XB<br>XB | EPI_ISL_4496893<br>EPI_ISL_4496904 |
|------------------------|------------------------|----------|------------------------------------|
| Omicron                | Omicron                | BA.1     | EPI_ISL_7808007                    |
| Omicron                | Omicron                | BA.1     | EPI_ISL_7808009                    |
| Omicron                | Omicron                | BA.1     | EPI_ISL_7808012                    |
| Omicron                | Omicron                | BA.1     | EPI_ISL_8131086                    |
| Omicron                | Omicron                | BA.1     | EPI_ISL_8131087                    |
| Omicron                | Omicron                | BA.1     | EPI_ISL_8131088                    |
| Omicron                | Omicron                | BA.1     | EPI_ISL_8131090                    |
| Omicron                | Omicron                | BA.1     | EPI_ISL_8131091                    |
| Omicron                | Omicron                | BA.1     | EPI_ISL_8131093                    |
| Omicron                | Omicron                | BA.1     | EPI_ISL_8131094                    |
| Omicron                | Omicron                | BA.1     | EPI_ISL_8131096                    |
| Omicron                | Omicron                | BA.1     | EPI_ISL_8131099                    |
| Omicron                | Omicron                | BA.1     | EPI_ISL_8131102                    |
| Omicron                | Omicron                | BA.1     | EPI_ISL_8131103                    |
| Omicron                | Omicron                | BA.1     | EPI_ISL_8131109                    |
| Omicron                | Omicron                | BA.1     | EPI_ISL_8131110                    |
| Omicron                | Omicron                | BA.1     | EPI_ISL_8131111                    |
| Omicron                | Omicron                | BA.1     | EPI_ISL_8131112                    |
| Omicron                | Omicron                | BA.1     | EPI_ISL_8131114                    |
| Omicron                | Omicron                | BA.1     | EPI_ISL_8131116                    |
| Omicron                | Omicron                | BA.1     | EPI_ISL_8131117                    |
| Omicron                | Omicron                | BA.1     | EPI_ISL_8131118                    |
| Omicron                | Omicron                | BA.1     | EPI_ISL_8131119                    |
| Omicron                | Omicron                | BA.1     | EPI_ISL_8131120                    |
| Omicron                | Omicron                | BA.1     | EPI_ISL_8131121                    |
| Omicron                | Omicron                | BA.1     | EPI_ISL_8131122                    |
| Omicron                | Omicron                | BA.1     | EPI_ISL_8131123                    |
| Omicron                | Omicron                | BA.1     | EPI_ISL_8131125                    |
| Omicron                | Omicron                | BA.1     | EPI_ISL_8131128                    |
| Omicron                | Omicron                | BA.1     | EPI_ISL_8406558                    |
| Omicron                | Omicron                | BA.1     | EPI_ISL_8406559                    |
| Omicron                | Omicron                | BA.1     | EPI_ISL_8406561                    |
| Omicron                | Omicron                | BA.1     | EPI_ISL_8406562                    |
| Omicron                | Omicron                | BA.1     | EPI_ISL_8406565                    |
| Omicron                | Omicron                | BA.1     | EPI_ISL_8406570                    |
| Omicron                | Omicron                | BA.1     | EPI_ISL_8406571                    |
| Omicron                | Omicron                | BA.1     | EPI_ISL_8406573                    |
| Omicron                | Omicron                | BA.1     | EPI_ISL_8406574                    |
| Omicron                | Omicron                | BA.1     | EPI_ISL_8406575                    |
| Omicron                | Omicron                | BA.1     | EPI_ISL_8406576                    |
| Omicron                | Omicron                | BA.1     | EPI_ISL_8406579                    |
| Omicron                | Omicron                | BA.1     | EPI_ISL_8406581                    |
| Omicron                | Omicron                | BA.1     | EPI_ISL_8406587                    |
| Omicron                | Omicron                | BA.1     | EPI_ISL_8406590                    |
| Omicron                | Omicron                | BA.1     | EPI_ISL_8406591                    |
| Omicron                | Omicron                | BA.1     | EPI_ISL_8406592                    |
| Omicron                | Omicron                | BA.1     | EPI_ISL_8406593                    |
| Omicron                | Omicron                | BA.1     | EPI_ISL_8406594                    |
| Omicron                | Omicron                | BA.1     | EPI_ISL_8406595                    |
| Omicron                | Omicron                | BA.1     | EPI_ISL_8406598                    |
| Omicron                | Omicron                | BA.1     | EPI_ISL_8435104                    |
| Omicron                | Omicron                | BA.1     | EPI_ISL_8749105                    |
| Omicron                | Omicron                | BA.1     | EPI_ISL_8749114                    |
| Omicron                | Omicron                | BA.1     | EPI_ISL_8749122                    |

|         |         |      |                 |
|---------|---------|------|-----------------|
| Omicron | Omicron | BA.1 | EPI_ISL_8749124 |
| Omicron | Omicron | BA.1 | EPI_ISL_8749126 |
| Omicron | Omicron | BA.1 | EPI_ISL_8749127 |
| Omicron | Omicron | BA.1 | EPI_ISL_8749129 |
| Omicron | Omicron | BA.1 | EPI_ISL_8749130 |
| Omicron | Omicron | BA.1 | EPI_ISL_8749132 |
| Omicron | Omicron | BA.1 | EPI_ISL_8749133 |
| Omicron | Omicron | BA.1 | EPI_ISL_8749134 |
| Omicron | Omicron | BA.1 | EPI_ISL_8749135 |
| Omicron | Omicron | BA.1 | EPI_ISL_8749136 |
| Omicron | Omicron | BA.1 | EPI_ISL_8749137 |
| Omicron | Omicron | BA.1 | EPI_ISL_8749138 |
| Omicron | Omicron | BA.1 | EPI_ISL_8749139 |
| Omicron | Omicron | BA.1 | EPI_ISL_8749141 |
| Omicron | Omicron | BA.1 | EPI_ISL_8749142 |
| Omicron | Omicron | BA.1 | EPI_ISL_8749143 |
| Omicron | Omicron | BA.1 | EPI_ISL_8749147 |
| Omicron | Omicron | BA.1 | EPI_ISL_8749150 |
| Omicron | Omicron | BA.1 | EPI_ISL_8749151 |
| Omicron | Omicron | BA.1 | EPI_ISL_8749152 |
| Omicron | Omicron | BA.1 | EPI_ISL_8749153 |
| Omicron | Omicron | BA.1 | EPI_ISL_8749155 |
| Omicron | Omicron | BA.1 | EPI_ISL_8749161 |
| Omicron | Omicron | BA.1 | EPI_ISL_8749164 |
| Omicron | Omicron | BA.1 | EPI_ISL_8953837 |
| Omicron | Omicron | BA.1 | EPI_ISL_8953838 |
| Omicron | Omicron | BA.1 | EPI_ISL_8953861 |
| Omicron | Omicron | BA.1 | EPI_ISL_8953864 |
| Omicron | Omicron | BA.1 | EPI_ISL_8953865 |
| Omicron | Omicron | BA.1 | EPI_ISL_8953868 |
| Omicron | Omicron | BA.1 | EPI_ISL_8953869 |
| Omicron | Omicron | BA.1 | EPI_ISL_8953872 |
| Omicron | Omicron | BA.1 | EPI_ISL_8953876 |
| Omicron | Omicron | BA.1 | EPI_ISL_8953877 |
| Omicron | Omicron | BA.1 | EPI_ISL_8953881 |
| Omicron | Omicron | BA.1 | EPI_ISL_8953886 |
| Omicron | Omicron | BA.1 | EPI_ISL_8953890 |
| Omicron | Omicron | BA.1 | EPI_ISL_8953891 |
| Omicron | Omicron | BA.1 | EPI_ISL_8953894 |
| Omicron | Omicron | BA.1 | EPI_ISL_8953898 |
| Omicron | Omicron | BA.1 | EPI_ISL_8953899 |
| Omicron | Omicron | BA.1 | EPI_ISL_8953902 |
| Omicron | Omicron | BA.1 | EPI_ISL_8953908 |
| Omicron | Omicron | BA.1 | EPI_ISL_8953909 |
| Omicron | Omicron | BA.1 | EPI_ISL_8953910 |
| Omicron | Omicron | BA.1 | EPI_ISL_8953912 |
| Omicron | Omicron | BA.1 | EPI_ISL_8953913 |
| Omicron | Omicron | BA.1 | EPI_ISL_8953917 |
| Omicron | Omicron | BA.1 | EPI_ISL_8953918 |
| Omicron | Omicron | BA.1 | EPI_ISL_8953921 |
| Omicron | Omicron | BA.1 | EPI_ISL_8953923 |
| Omicron | Omicron | BA.1 | EPI_ISL_8953924 |
| Omicron | Omicron | BA.1 | EPI_ISL_8953926 |
| Omicron | Omicron | BA.1 | EPI_ISL_8953930 |
| Omicron | Omicron | BA.1 | EPI_ISL_8953932 |
| Omicron | Omicron | BA.1 | EPI_ISL_8953933 |

|         |         |        |                 |
|---------|---------|--------|-----------------|
| Omicron | Omicron | BA.1   | EPI_ISL_8953934 |
| Omicron | Omicron | BA.1   | EPI_ISL_8953935 |
| Omicron | Omicron | BA.1   | EPI_ISL_8953937 |
| Omicron | Omicron | BA.1   | EPI_ISL_8953938 |
| Omicron | Omicron | BA.1   | EPI_ISL_8953940 |
| Omicron | Omicron | BA.1   | EPI_ISL_8953942 |
| Omicron | Omicron | BA.1   | EPI_ISL_8953949 |
| Omicron | Omicron | BA.1   | EPI_ISL_8953951 |
| Omicron | Omicron | BA.1   | EPI_ISL_8953955 |
| Omicron | Omicron | BA.1   | EPI_ISL_8953957 |
| Omicron | Omicron | BA.1   | EPI_ISL_8953959 |
| Omicron | Omicron | BA.1   | EPI_ISL_8953960 |
| Omicron | Omicron | BA.1   | EPI_ISL_8953961 |
| Omicron | Omicron | BA.1.1 | EPI_ISL_8131089 |
| Omicron | Omicron | BA.1.1 | EPI_ISL_8131092 |
| Omicron | Omicron | BA.1.1 | EPI_ISL_8131095 |
| Omicron | Omicron | BA.1.1 | EPI_ISL_8131097 |
| Omicron | Omicron | BA.1.1 | EPI_ISL_8131098 |
| Omicron | Omicron | BA.1.1 | EPI_ISL_8131100 |
| Omicron | Omicron | BA.1.1 | EPI_ISL_8131101 |
| Omicron | Omicron | BA.1.1 | EPI_ISL_8131104 |
| Omicron | Omicron | BA.1.1 | EPI_ISL_8131105 |
| Omicron | Omicron | BA.1.1 | EPI_ISL_8131106 |
| Omicron | Omicron | BA.1.1 | EPI_ISL_8131107 |
| Omicron | Omicron | BA.1.1 | EPI_ISL_8131108 |
| Omicron | Omicron | BA.1.1 | EPI_ISL_8131113 |
| Omicron | Omicron | BA.1.1 | EPI_ISL_8131115 |
| Omicron | Omicron | BA.1.1 | EPI_ISL_8131124 |
| Omicron | Omicron | BA.1.1 | EPI_ISL_8131126 |
| Omicron | Omicron | BA.1.1 | EPI_ISL_8131127 |
| Omicron | Omicron | BA.1.1 | EPI_ISL_8406560 |
| Omicron | Omicron | BA.1.1 | EPI_ISL_8406563 |
| Omicron | Omicron | BA.1.1 | EPI_ISL_8406564 |
| Omicron | Omicron | BA.1.1 | EPI_ISL_8406566 |
| Omicron | Omicron | BA.1.1 | EPI_ISL_8406567 |
| Omicron | Omicron | BA.1.1 | EPI_ISL_8406569 |
| Omicron | Omicron | BA.1.1 | EPI_ISL_8406572 |
| Omicron | Omicron | BA.1.1 | EPI_ISL_8406577 |
| Omicron | Omicron | BA.1.1 | EPI_ISL_8406580 |
| Omicron | Omicron | BA.1.1 | EPI_ISL_8406582 |
| Omicron | Omicron | BA.1.1 | EPI_ISL_8406583 |
| Omicron | Omicron | BA.1.1 | EPI_ISL_8406584 |
| Omicron | Omicron | BA.1.1 | EPI_ISL_8406585 |
| Omicron | Omicron | BA.1.1 | EPI_ISL_8406586 |
| Omicron | Omicron | BA.1.1 | EPI_ISL_8406588 |
| Omicron | Omicron | BA.1.1 | EPI_ISL_8406589 |
| Omicron | Omicron | BA.1.1 | EPI_ISL_8406596 |
| Omicron | Omicron | BA.1.1 | EPI_ISL_8406597 |
| Omicron | Omicron | BA.1.1 | EPI_ISL_8749096 |
| Omicron | Omicron | BA.1.1 | EPI_ISL_8749123 |
| Omicron | Omicron | BA.1.1 | EPI_ISL_8749125 |
| Omicron | Omicron | BA.1.1 | EPI_ISL_8749128 |
| Omicron | Omicron | BA.1.1 | EPI_ISL_8749131 |
| Omicron | Omicron | BA.1.1 | EPI_ISL_8749140 |
| Omicron | Omicron | BA.1.1 | EPI_ISL_8749144 |
| Omicron | Omicron | BA.1.1 | EPI_ISL_8749145 |



|         |         |        |                 |
|---------|---------|--------|-----------------|
| Omicron | Omicron | BA.1.1 | EPI_ISL_8953941 |
| Omicron | Omicron | BA.1.1 | EPI_ISL_8953950 |
| Omicron | Omicron | BA.1.1 | EPI_ISL_8953952 |
| Omicron | Omicron | BA.1.1 | EPI_ISL_8953953 |
| Omicron | Omicron | BA.1.1 | EPI_ISL_8953954 |
| Omicron | Omicron | BA.1.1 | EPI_ISL_8953956 |
| Omicron | Omicron | BA.1.1 | EPI_ISL_8953958 |
| Omicron | Omicron | BA.1.1 | EPI_ISL_8953962 |

VOC, variant of concern

<sup>a</sup> Pangolin version 3.1.17

108  
109  
110

111 **Supplemental Table 4.** Patient Characteristics and Aggregate Genotyping RT-qPCR Screening Results  
 112 During Initial Study Period (n=1,657)  
 113

| Characteristic                              | All SARS-CoV-2 Infections | RT-qPCR Subset | WGS Validation Subset |
|---------------------------------------------|---------------------------|----------------|-----------------------|
| Patients                                    | 1,657                     | 1,093          | 502                   |
| Age at First Positive NAAT                  | 33 [21-49]                | 33 [22-49]     | 33 [22-48]            |
| Female                                      | 842 (51%)                 | 571 (52%)      | 265 (53%)             |
| Initial Diagnostic Specimen                 | -                         | -              | -                     |
| Month of Diagnosis                          | -                         | -              | -                     |
| May 2021 & prior                            | 416 (25%)                 | 299 (27%)      | 87 (17%)              |
| June 2021                                   | 224 (14%)                 | 149 (14%)      | 77 (15%)              |
| July 2021 & after                           | 1017 (61%)                | 645 (59%)      | 338 (67%)             |
| Specimen Collection Site                    | -                         | -              | -                     |
| Outpatient COVID-19 Screening Site          | 658 (40%)                 | 412 (38%)      | 198 (39%)             |
| Emergency Department                        | 392 (24%)                 | 287 (26%)      | 104 (21%)             |
| Outpatient Laboratory                       | 167 (10%)                 | 100 (9%)       | 57 (11%)              |
| Occupational/Student Health                 | 160 (10%)                 | 104 (10%)      | 67 (13%)              |
| Outpatient Clinic                           | 105 (6%)                  | 57 (5%)        | 36 (7%)               |
| Urgent Care                                 | 80 (5%)                   | 63 (6%)        | 34 (7%)               |
| Inpatient                                   | 49 (3%)                   | 30 (3%)        | 4 (1%)                |
| Perioperative/Periprocedural                | 46 (3%)                   | 40 (4%)        | 2 (<1%)               |
| Specimen Source                             | -                         | -              | -                     |
| Nasopharyngeal Swab                         | 989 (59%)                 | 661 (61%)      | 281 (56%)             |
| Mid-Turbinate Nasal Swab                    | 659 (40%)                 | 428 (39%)      | 219 (44%)             |
| Other <sup>a</sup>                          | 9 (1%)                    | 4 (<1%)        | 2 (<1%)               |
| NAAT Platform                               | -                         | -              | -                     |
| Hologic Panther <sup>b</sup>                | 869 (52%)                 | 512 (47%)      | 246 (49%)             |
| Cepheid GeneXpert <sup>c</sup>              | 234 (14%)                 | 180 (16%)      | 87 (17%)              |
| Applied Biosystems QuantStudio <sup>b</sup> | 220 (13%)                 | 155 (14%)      | 93 (19%)              |
| Genmark Eplex <sup>c</sup>                  | 169 (10%)                 | 133 (12%)      | 19 (4%)               |
| Qiagen Rotor-Gene LDT <sup>b</sup>          | 136 (8%)                  | 85 (8%)        | 44 (9%)               |
| Roche Liat <sup>c</sup>                     | 29 (2%)                   | 28 (3%)        | 13 (3%)               |
| Variant of Concern                          | -                         | -              | -                     |
| Alpha                                       | -                         | 150 (14%)      | 43 (9%)               |
| Beta <sup>d</sup>                           | -                         | 6 (1%)         | 2 (<1%)               |
| Gamma <sup>d</sup>                          | -                         | 32 (3%)        | 20 (4%)               |
| Delta                                       | -                         | 660 (60%)      | 378 (75%)             |
| Not a Variant of Concern                    | -                         | 93 (9%)        | 59 (12%)              |
| Unable to Genotype <sup>e</sup>             | -                         | 152 (14%)      | -                     |

Data provided as N (column %) or median [interquartile range]

NAAT, nucleic acid amplification test; LDT, lab-developed test; RT-qPCR, reverse transcription quantitative polymerase chain reaction; WGS, whole-genome sequencing

<sup>a</sup> Other includes Nasal Swab, Lung BAL, Oropharynx

<sup>b</sup> Laboratory-based testing methods

<sup>c</sup> Near-care testing methods

<sup>d</sup> RT-qPCR cannot distinguish variants of concern Beta and Gamma variants from variant of interest Mu.

<sup>e</sup> Low viral load, amplification failure, or reaction set-up failure.
